# Supplementary material
Source: Springer Nature journal article supplement (https://www.springermedizin.de/resource/supplementary/12883_2004_38_MOESM2_ESM.pdf/9456720)

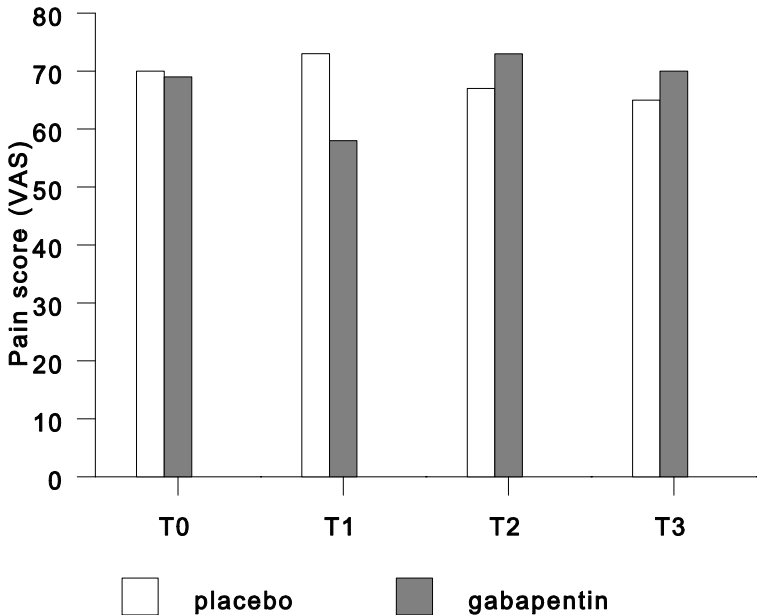

Supplement: MOESM2 [file 9456720]
